# Supplementary material
Source: PubMed Central journal article supplement (PMC6833322)
Supplement: rsif20190292supp2.pdf [file rsif20190292supp2.pdf]

## Humans falling in holes: Adaptations in lower-limb joint mechanics in response to a rapid change in substrate height during human hopping

Taylor J.M. Dick<sup>1</sup>, Laksh K. Punith<sup>2</sup>, Gregory S. Sawicki<sup>2</sup>

Supplementary Table 1. Summary of statistical results

| peak ankle plantarflexion angle |                                            |                    |             |
|---------------------------------|--------------------------------------------|--------------------|-------------|
| full model                      | lme(ank_ang~hop*height, random = subject)  |                    |             |
|                                 | hop                                        | $f_{1,45} = 0.155$ | $p=0.695$   |
|                                 | height                                     | $f_{2,45} = 6.112$ | $p=0.004^*$ |
|                                 | hop*height                                 | $f_{2,45} = 4.225$ | $p=0.021^*$ |
| height=20                       | hop                                        | $f_{1,9} = 4.451$  | $p=0.064$   |
| height=10                       | hop                                        | $f_{1,9} = 0.002$  | $p=0.967$   |
| height=5                        | hop                                        | $f_{1,9} = 8.023$  | $p=0.019^*$ |
| peak ankle dorsiflexion angle   |                                            |                    |             |
| full model                      | lme(ank_ang~hop*height, random = subject)  |                    |             |
|                                 | hop                                        | $f_{1,45} = 3.376$ | $p=0.073$   |
|                                 | height                                     | $f_{2,45} = 4.767$ | $p=0.013^*$ |
|                                 | hop*height                                 | $f_{2,45} = 1.222$ | $p=0.12$    |
| peak knee extension angle       |                                            |                    |             |
| full model                      | lme(knee_ang~hop*height, random = subject) |                    |             |
|                                 | hop                                        | $f_{1,45} = 0.663$ | $p=0.419$   |
|                                 | height                                     | $f_{2,45} = 1.589$ | $p=0.212$   |
|                                 | hop*height                                 | $f_{2,45} = 1.463$ | $p=0.242$   |
| peak knee flexion angle         |                                            |                    |             |
| full model                      | lme(knee_ang~hop*height, random = subject) |                    |             |
|                                 | hop                                        | $f_{1,45} = 1.559$ | $p=0.218$   |
|                                 | height                                     | $f_{2,45} = 8.488$ | $p<0.001^*$ |
|                                 | hop*height                                 | $f_{2,45} = 7.156$ | $p=0.002^*$ |
| height=20                       | hop                                        | $f_{1,9} = 5.692$  | $p=0.041^*$ |
| height=10                       | hop                                        | $f_{1,9} = 0.009$  | $p=0.927$   |
| height=5                        | hop                                        | $f_{1,9} = 10.701$ | $p=0.01^*$  |
| peak hip extension angle        |                                            |                    |             |
| full model                      | lme(hip_ang~hop*height, random = subject)  |                    |             |
|                                 | hop                                        | $f_{1,45} = 1.472$ | $p=0.232$   |
|                                 | height                                     | $f_{2,45} = 0.007$ | $p=0.994$   |
|                                 | hop*height                                 | $f_{2,45} = 1.527$ | $p=0.229$   |
| peak hip flexion angle          |                                            |                    |             |
| full model                      | lme(hip_ang~hop*height, random = subject)  |                    |             |

Dick et al., (2019) *Interface*. Humans falling in holes: Adaptations in lower-limb joint mechanics in response to a rapid change in substrate height during human hopping

|                             |                                              |                      |               |
|-----------------------------|----------------------------------------------|----------------------|---------------|
|                             | hop                                          | $f_{1,45} = 2.800$   | $p = 0.101$   |
|                             | height                                       | $f_{2,45} = 1.366$   | $p = 0.265$   |
|                             | hop*height                                   | $f_{2,45} = 6.187$   | $p = 0.004^*$ |
| <b>height=20</b>            | hop                                          | $f_{1,9} = 10.834$   | $p = 0.009^*$ |
| <b>height=10</b>            | hop                                          | $f_{1,9} = 0.013$    | $p = 0.912$   |
| <b>height=5</b>             | hop                                          | $f_{1,9} = 0.684$    | $p = 0.429$   |
| <b>ankle moment</b>         |                                              |                      |               |
| <b>full model</b>           | lme(ank_mom~hop*height, random = subject)    |                      |               |
|                             | hop                                          | $f_{1,45} = 81.103$  | $p < 0.001^*$ |
|                             | height                                       | $f_{2,45} = 1.048$   | $p = 0.359$   |
|                             | hop*height                                   | $f_{2,45} = 0.713$   | $p = 0.495$   |
| <b>knee moment</b>          |                                              |                      |               |
| <b>full model</b>           | lme(knee_mom~hop*height, random = subject)   |                      |               |
|                             | hop                                          | $f_{1,45} = 0.269$   | $p = 0.606$   |
|                             | height                                       | $f_{2,45} = 1.-26$   | $p = 0.366$   |
|                             | hop*height                                   | $f_{2,45} = 2.962$   | $p = 0.062$   |
| <b>hip moment</b>           |                                              |                      |               |
| <b>full model</b>           | lme(hip_mom~hop*height, random = subject)    |                      |               |
|                             | hop                                          | $f_{1,45} = 20.620$  | $p < 0.001^*$ |
|                             | height                                       | $f_{2,45} = 1.981$   | $p = 0.150$   |
|                             | hop*height                                   | $f_{2,45} = 0.2.066$ | $p = 0.139$   |
| <b>positive ankle power</b> |                                              |                      |               |
| <b>full model</b>           | lme(ankpow_pos~hop*height, random = subject) |                      |               |
|                             | hop                                          | $f_{1,45} = 41.452$  | $p < 0.001^*$ |
|                             | height                                       | $f_{2,45} = 1.758$   | $p = 0.187$   |
|                             | hop*height                                   | $f_{2,45} = 0.036$   | $p = 0.965$   |
| <b>negative ankle power</b> |                                              |                      |               |
| <b>full model</b>           | lme(ankpow_neg~hop*height, random = subject) |                      |               |
|                             | hop                                          | $f_{1,45} = 58.476$  | $p < 0.001^*$ |
|                             | height                                       | $f_{2,45} = 6.641$   | $p < 0.001^*$ |
|                             | hop*height                                   | $f_{2,45} = 8.530$   | $p < 0.001^*$ |
| <b>height=20</b>            | hop                                          | $f_{1,9} = 18.370$   | $p = 0.003^*$ |
| <b>height=10</b>            | hop                                          | $f_{1,9} = 76.781$   | $p < 0.001^*$ |
| <b>height=5</b>             | hop                                          | $f_{1,9} = 66.226$   | $p < 0.001^*$ |
| <b>net ankle power</b>      |                                              |                      |               |
| <b>full model</b>           | lme(ankpow_net~hop*height, random = subject) |                      |               |
|                             | hop                                          | $f_{1,45} = 20.779$  | $p < 0.001^*$ |
|                             | height                                       | $f_{2,45} = 8.316$   | $p < 0.001^*$ |

Dick et al., (2019) *Interface*. Humans falling in holes: Adaptations in lower-limb joint mechanics in response to a rapid change in substrate height during human hopping

|                            |                                               |                     |             |
|----------------------------|-----------------------------------------------|---------------------|-------------|
|                            | hop*height                                    | $f_{2,45} = 7.542$  | $p=0.002^*$ |
| <b>height=20</b>           | hop                                           | $f_{1,9} = 12.564$  | $p=0.008^*$ |
| <b>height=10</b>           | hop                                           | $f_{1,9} = 13.845$  | $p=0.006^*$ |
| <b>height=5</b>            | hop                                           | $f_{1,9} = 0.186$   | $p=0.677$   |
| <b>positive knee power</b> |                                               |                     |             |
| <b>full model</b>          | lme(kneepow_pos~hop*height, random = subject) |                     |             |
|                            | hop                                           | $f_{1,45} = 0.513$  | $p=0.478$   |
|                            | height                                        | $f_{2,45} = 0.599$  | $p=0.554$   |
|                            | hop*height                                    | $f_{2,45} = 0.555$  | $p=0.578$   |
| <b>negative knee power</b> |                                               |                     |             |
| <b>full model</b>          | lme(kneepow_neg~hop*height, random = subject) |                     |             |
|                            | hop                                           | $f_{1,45} = 4.536$  | $p=0.039^*$ |
|                            | height                                        | $f_{2,45} = 2.262$  | $p=0.117$   |
|                            | hop*height                                    | $f_{2,45} = 3.104$  | $p=0.046^*$ |
| <b>height=20</b>           | hop                                           | $f_{1,9} = 5.695$   | $p=0.044^*$ |
| <b>height=10</b>           | hop                                           | $f_{1,9} = 0.412$   | $p=0.539$   |
| <b>height=5</b>            | hop                                           | $f_{1,9} = 0.079$   | $p=0.785$   |
| <b>net knee power</b>      |                                               |                     |             |
| <b>full model</b>          | lme(kneepow_net~hop*height, random = subject) |                     |             |
|                            | hop                                           | $f_{1,45} = 4.590$  | $p=0.038^*$ |
|                            | height                                        | $f_{2,45} = 1.611$  | $p=0.212$   |
|                            | hop*height                                    | $f_{2,45} = 2.437$  | $p=0.1$     |
| <b>positive hip power</b>  |                                               |                     |             |
| <b>full model</b>          | lme(hippow_pos~hop*height, random = subject)  |                     |             |
|                            | hop                                           | $f_{1,45} = 14.759$ | $p<0.001^*$ |
|                            | height                                        | $f_{2,45} = 0.370$  | $p=0.693$   |
|                            | hop*height                                    | $f_{2,45} = 0.080$  | $p=0.923$   |
| <b>negative hip power</b>  |                                               |                     |             |
| <b>full model</b>          | lme(hippow_neg~hop*height, random = subject)  |                     |             |
|                            | hop                                           | $f_{1,45} = 4.979$  | $p=0.031^*$ |
|                            | height                                        | $f_{2,45} = 2.043$  | $p=0.143$   |
|                            | hop*height                                    | $f_{2,45} = 2.141$  | $p=0.131$   |
| <b>net hip power</b>       |                                               |                     |             |
| <b>full model</b>          | lme(hippow_net~hop*height, random = subject)  |                     |             |
|                            | hop                                           | $f_{1,45} = 1.697$  | $p=0.200$   |
|                            | height                                        | $f_{2,45} = 3.407$  | $p=0.043^*$ |
|                            | hop*height                                    | $f_{2,45} = 2.900$  | $p=0.066$   |

Dick et al., (2019) *Interface*. Humans falling in holes: Adaptations in lower-limb joint mechanics in response to a rapid change in substrate height during human hopping

*For all analyses, a within subject design was used, including subject as random factor using the lme.r function from the nlme package (pinheiro et al., 2017) in r (v3.4.3, vienna, austria). To examine variation in joint angles, joint moments, and joint powers between factors (hop cycle ([hop]: p-1, p, p+1; drop [height]: 5cm, 10cm, 20cm) we specified the model with lme.r function, and then used glht.r function from the multcomp package (hothorn et al., 2008) to perform tukey post-hoc tests where appropriate differences were considered significant at the  $p < 0.05$  level.*
